# Supplementary material for: Proximity to agriculture is correlated with pesticide tolerance: evidence for the evolution of amphibian resistance to modern pesticides
Source: PubMed Central journal article supplement (PMC5779125; doi:10.1111/eva.12069), 2013-04-30

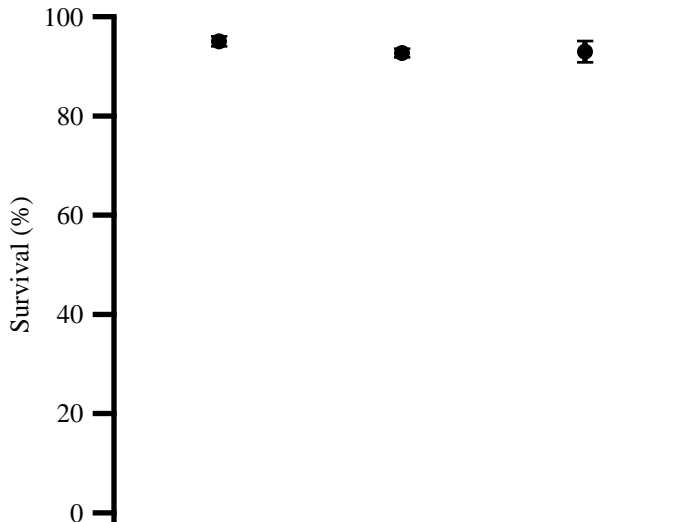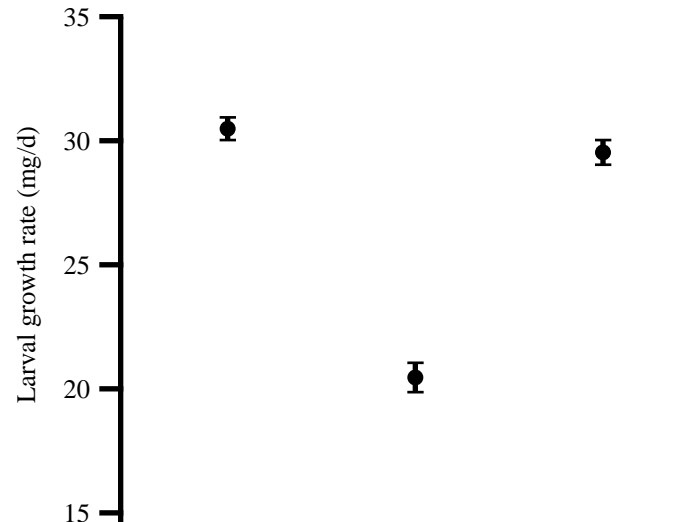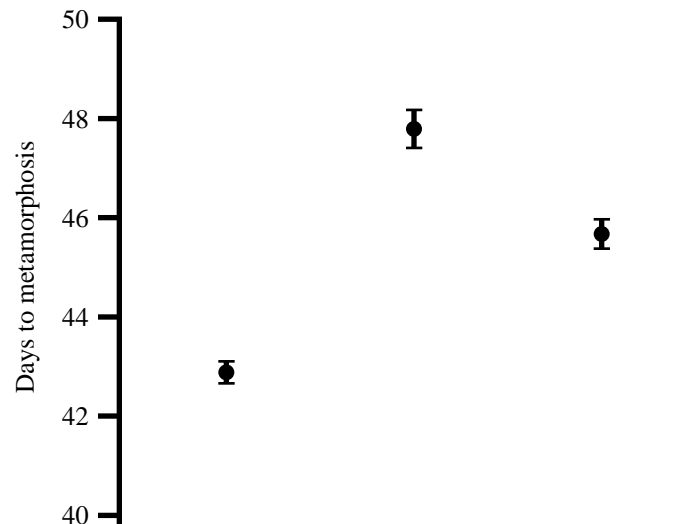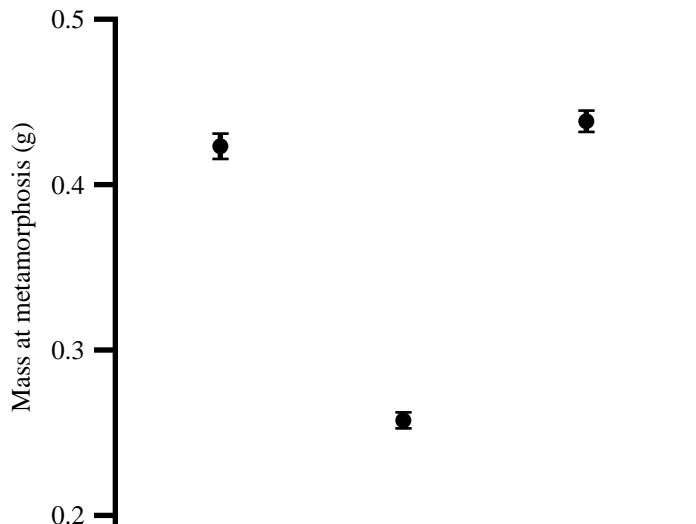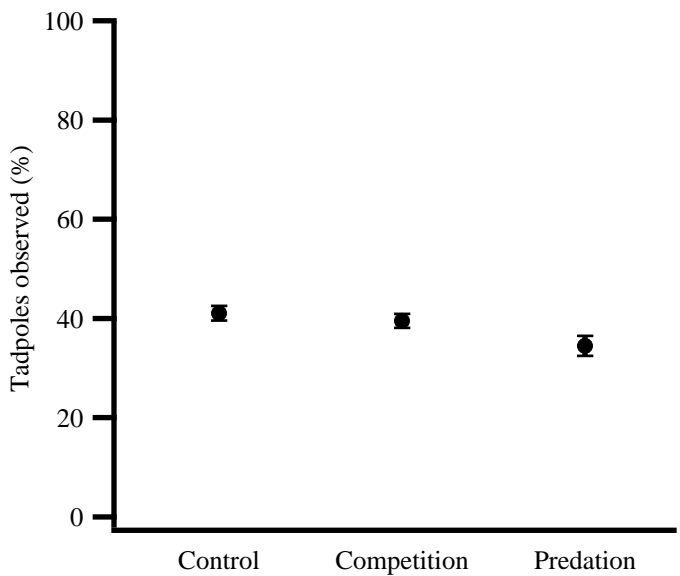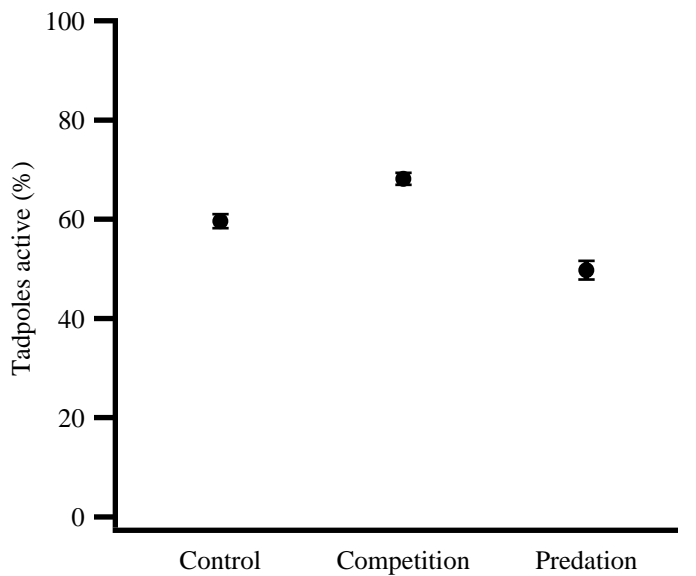

Supplement: EVA-6-832-s004.pdf [file EVA-6-832-s004.pdf]
